# Supplementary material for: Simultaneous delignification and selective catalytic transformation of agricultural lignocellulose in cooperative ionic liquid pairs
Source: Royal Society of Chemistry journal article supplement (doi:10.1039/c2gc35105f), 2012-01-01
Supplement: c2gc35105f.pdf [file c2gc35105f.pdf]

## Electronic Supplementary Information

### Simultaneous Delignification and Selective Catalytic Transformation of Agricultural Lignocellulose in Cooperative Ionic Liquid Pairs

*Jinxing Long, Xuehui Li\*, Bin Guo, Furong Wang, Yinghao Yu, and Lefu Wang*  
*School of Chemistry and Chemical Engineering, Pulp & Paper Engineering State Key Laboratory of*  
*China, South China University of Technology, Guangzhou 510640, P. R. China*

\*To whom correspondence should be addressed. E-mail: [cexhli@scut.edu.cn](mailto:cexhli@scut.edu.cn)

#### Contents of the supplementary information:

|                                                                                                |     |
|------------------------------------------------------------------------------------------------|-----|
| Materials and methods                                                                          | S2  |
| Acidity determination of ILs                                                                   | S3  |
| Primary ingredients of original lignocelluloses                                                | S4  |
| Effect of catalyst on the molecular weight distribution of non-volatile fractions              | S5  |
| Ion chromatography analysis of Cl <sup>-</sup> and HSO <sub>4</sub> <sup>-</sup>               | S6  |
| <sup>1</sup> H-NMR and <sup>13</sup> C-NMR analysis of fresh and recycled cooperative IL pairs | S6  |
| GC-MS analyses of the volatile biochemicals                                                    | S7  |
| SEM images from different catalytic systems                                                    | S10 |
| GPC analysis on the average molecular weight of extracted lignin                               | S10 |
| References                                                                                     | S11 |

## Materials and methods

All reagents used in this study were analytic grade except special illumination. N-methylimidazole, 1,4-buthane sultone, ethyl chloropropionate, 1-chlorobutane, methanol (HPLC grade) and tetrahydrofuran (THF, HPLC grade) were purchased from Acros (Belgium) and used as received. Other reagents were supplied by Guanghua Chemical Factory Co., Ltd. (Shantou, China) and redistilled before use. The sugarcane bagasse were provide by Jinling sugar Co., Ltd. Others were obtained from the Panyu farm, the suburbs of Guangzhou, Guangdong province, China. All lignocelluloses used were acquired from the current season plant (the Autumn in 2011). They were milled and sieved to get powder with particles size among 40-60 meshes followed by dried under vacuum at 80 °C for 24 h prior to use. The ILs (Scheme S1) 1-butyl-3-methyl imidazolium chloride (bmimCl)<sup>1</sup>, 1-(4-sulfobutyl)-3-methyl imidazolium hydrosulfate (C<sub>4</sub>H<sub>8</sub>SO<sub>3</sub>HmimHSO<sub>4</sub>)<sup>2,3</sup>, N-methyl imidazolium hydrosulfate (mimHSO<sub>4</sub>)<sup>4</sup>, 1-butyl-3-methyl imidazolium hydrosulfate (bmimHSO<sub>4</sub>)<sup>5,6</sup>, and 1-(2-carboxyethyl)-3-methyl imidazolium chloride (C<sub>2</sub>H<sub>4</sub>COOHmimCl)<sup>7,8</sup> used in the experiments were synthesized according to reported procedures and characterized by <sup>1</sup>H-NMR, <sup>13</sup>C-NMR, electrospray ionization-mass spectrometry (ESI-MS) and thermogravimetric analysis (TG). Ion chromatography and element analysis<sup>9</sup> demonstrated that their purities were all greater than 99 %.

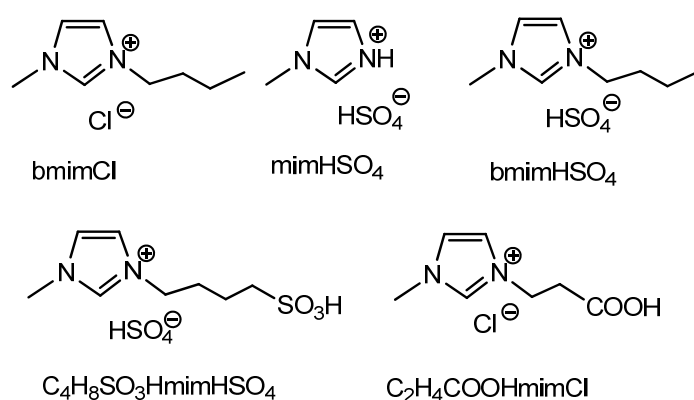

Scheme S1 ILs used in the experiment

## Acidity determination of ILs

The acidic strength of acidic ILs in CH<sub>3</sub>OH were evaluated using UV-vis spectra according to the reported method.<sup>10</sup> Some details were as following: the 0.01 mol/L IL solvent was prepared using dry CH<sub>3</sub>OH and IL that had been pre-dried under vacuum at 70 °C for 24 h. 2,4-Dinitroaniline was selected as an indicator. All spectra were obtained with a Shimadzu UV-2450 spectrophotometer.

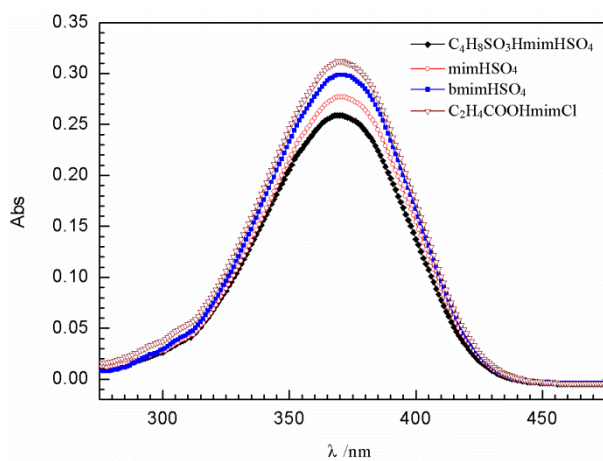

Figure S1 Acidic strengths of IL catalysts

Condition: 0.01 mol/L dried IL-methanol solution; 25 °C; 2,4-dinitroaniline used as indicator.

## Primary ingredients and composited elements of original lignocelluloses

All raw materials were dried sufficiently under vacuum at 80°C until their weights weren't changed any more (24 h). TAPPI test method T249 cm-85 was used for determining the contents of cellulose and hemicellulose, and TAPPI test method T222 om-88 for lignin. The percentage of ashes was estimated by the conservation of mass on the assumption that lignocelluloses were only composed of cellulose, hemicellulose, lignin and ashes. The composited elements were determined by a vario EL III element analyzer, where the oxygen content was estimated by the conservation of mass based on the assumption that the samples only contain C, H, N, S and O. Main ingredients and composited elements of raw lignocelluloses were listed in Table S1.

Table S1 Primary ingredients and elements of natural lignocelluloses

| Primary ingredients |           |               |        |       |       |
|---------------------|-----------|---------------|--------|-------|-------|
| Lignocelluloses     | Cellulose | Hemicellulose | Lignin | Ashes |       |
| Bagasse             | 46.47     | 33.35         | 18.96  | 1.22  |       |
| Rice straw          | 45.51     | 29.69         | 9.66   | 15.14 |       |
| Rice husk           | 32.43     | 39.65         | 15.82  | 12.10 |       |
| Corn stalk          | 37.13     | 45.41         | 12.58  | 4.88  |       |
| Corncob             | 34.65     | 52.76         | 10.32  | 2.27  |       |
| Composited elements |           |               |        |       |       |
| Raw material        | C (%)     | H (%)         | O (%)  | N (%) | S (%) |
| Bagasse             | 45.2      | 7.1           | 47.1   | 0.4   | 0.2   |
| Rice straw          | 43.8      | 7.9           | 45.8   | 1.2   | 1.3   |
| Rice husk           | 46.4      | 8.3           | 42.6   | 1.6   | 1.1   |
| Corn stalk          | 44.9      | 7.9           | 45.4   | 1.3   | 0.5   |
| Corncob             | 43.8      | 9.1           | 44.2   | 0.9   | 2.0   |

On a dry basis (the sample was dried under vacuum at 80 °C for 24 h)

## Effect of catalyst on the molecular weight distribution of non-volatile fractions

The effect of acid IL catalysts on the molecular weight distribution of CH<sub>3</sub>OH-soluble and THF-soluble fractions was determined by GPC analysis using extra standard method. Results were shown in Figure S2 and Table S2.

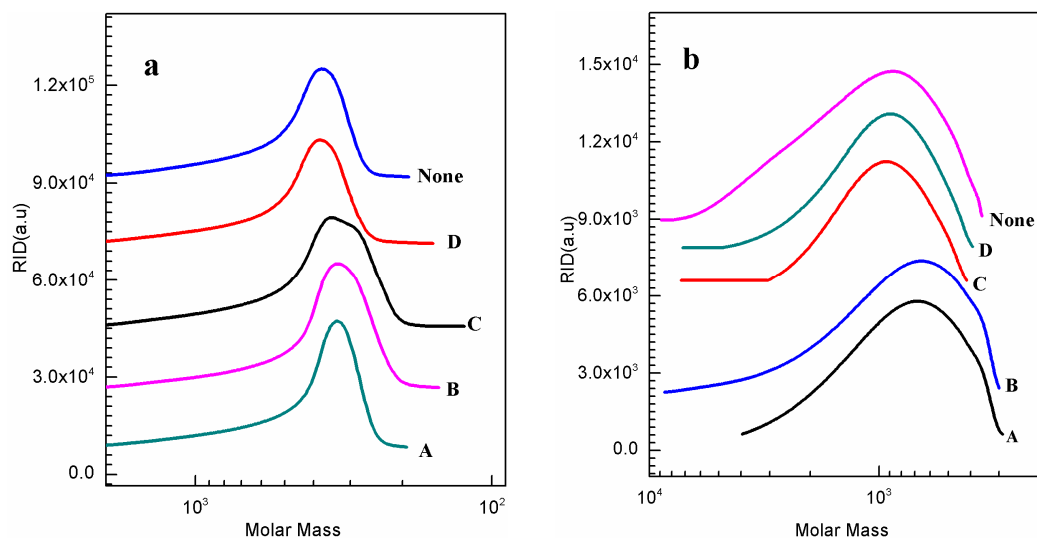

Figure S2 The molecular weight distribution of (a) CH<sub>3</sub>OH soluble products; (b) THF soluble products. A: C<sub>4</sub>H<sub>8</sub>SO<sub>3</sub>HmimHSO<sub>4</sub>; B: mimHSO<sub>4</sub>; C: bmimHSO<sub>4</sub>; D: C<sub>2</sub>H<sub>4</sub>COOHmimCl

Table S2 Effect of catalyst on the average molar mass of CH<sub>3</sub>OH-soluble and THF-soluble products from bagasse liquefaction

| Entry | Catalyst                                                           | CH <sub>3</sub> OH-soluble fraction |                |                | THF-soluble fraction |                |                |
|-------|--------------------------------------------------------------------|-------------------------------------|----------------|----------------|----------------------|----------------|----------------|
|       |                                                                    | M <sub>n</sub>                      | M <sub>w</sub> | M <sub>z</sub> | M <sub>n</sub>       | M <sub>w</sub> | M <sub>z</sub> |
| 1     | C <sub>4</sub> H <sub>8</sub> SO <sub>3</sub> HmimHSO <sub>4</sub> | 488                                 | 689            | 878            | 719                  | 949            | 1283           |
| 2     | mimHSO <sub>4</sub>                                                | 507                                 | 729            | 958            | 737                  | 1076           | 1269           |
| 3     | bmimHSO <sub>4</sub>                                               | 531                                 | 760            | 982            | 747                  | 1107           | 1374           |
| 4     | C <sub>2</sub> H <sub>4</sub> COOHmimCl                            | 572                                 | 789            | 893            | 922                  | 1150           | 1481           |
| 5     | None                                                               | 698                                 | 812            | 1053           | 990                  | 1473           | 2251           |

Reaction conditions: 2.0 mmol catalyst, 10 g bmimCl (pre-dissolved in 5 mL CH<sub>3</sub>OH), 3.0 g bagasse and 70 mL cyclohexane; 200 °C, 230 r/min, 15 min.

## Ion chromatography analysis of $\text{Cl}^-$ and $\text{HSO}_4^-$

The  $\text{Cl}^-$  and  $\text{HSO}_4^-$  content of fresh ionic liquids and the recycled one after 4 runs were measured by external standard method with a 792 Basic ion chromatography apparatus (Switzerland). Sodium chloride and potassium hydrogen sulfate were used as standard compound respectively.

## $^1\text{H}$ -NMR and $^{13}\text{C}$ -NMR analysis of fresh and recycled cooperative IL pairs

The  $^1\text{H}$  NMR and  $^{13}\text{C}$ -NMR spectrum of fresh and recycled cooperative IL pairs  $\text{C}_4\text{H}_8\text{SO}_3\text{HmimHSO}_4/\text{bmimCl}$  under the optimized reaction conditions were measured by Bruker AVANCE III 400 apparatus with  $\text{D}_2\text{O}$  as solvent.

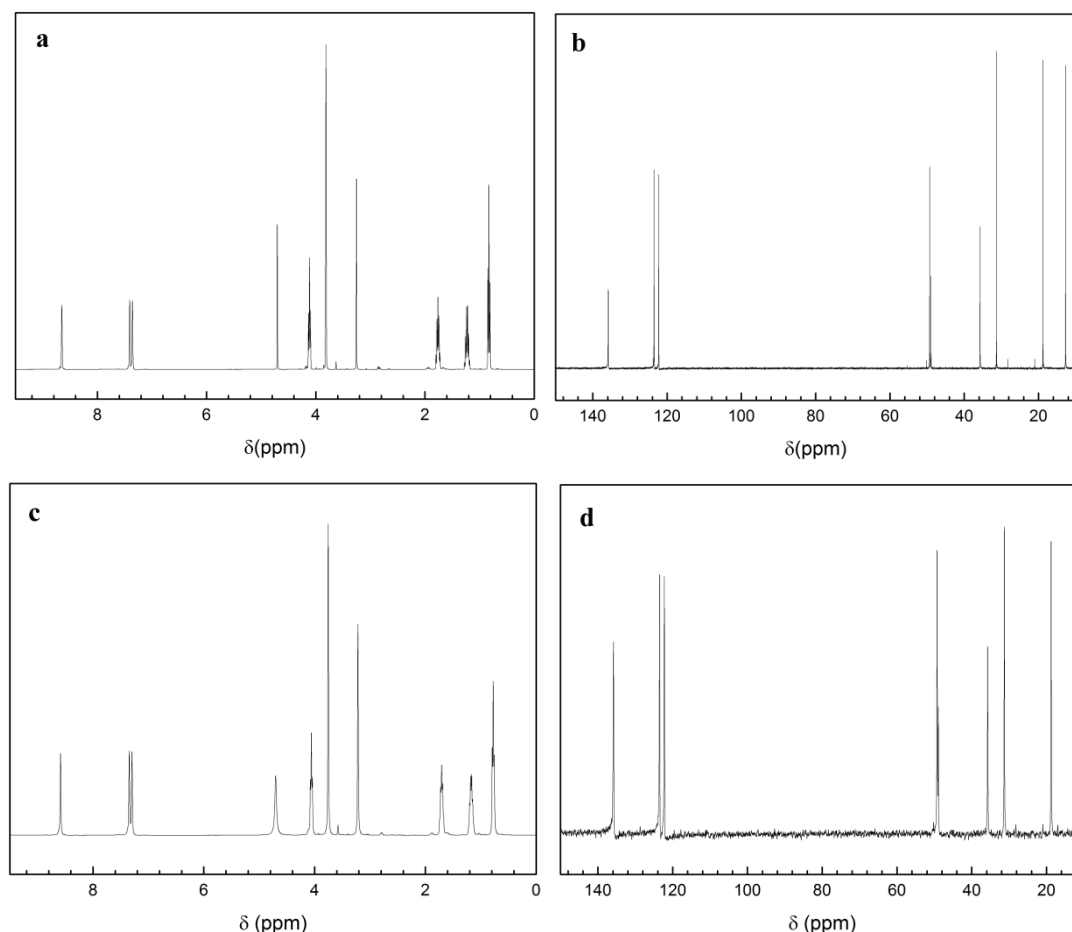

Figure S3  $^1\text{H}$ -NMR and  $^{13}\text{C}$ -NMR spectra of fresh (a, b) and recycled (c, d) cooperative IL pairs  $\text{C}_4\text{H}_8\text{SO}_3\text{HmimHSO}_4/\text{bmimCl}$

The cooperative IL pairs were composed of 10 g  $\text{bmimCl}$  and 2 mmol  $\text{C}_4\text{H}_8\text{SO}_3\text{HmimHSO}_4$ . Recycled IL pairs after 4 run were obtained under the optimized reaction conditions as shown in Table 1, Entry 12.

## GC-MS analysis of the volatile biochemicals

The volatile products were analyzed on a Shimadzu QP 2010 plus GC-MS spectrometer and identified according to the NIST MS library (capillary column: Shimadzu RTX-5, 30 m×0.25 mm×0.25  $\mu$ m; programmed oven temperature: 60 °C, hold 3 min at 60 °C and then ramped up with 8 °C/min to 280 °C and hold for another 5 min; injector: kept at 280 °C in split mode with split ratio of 5: 1; helium as the carrier gas).

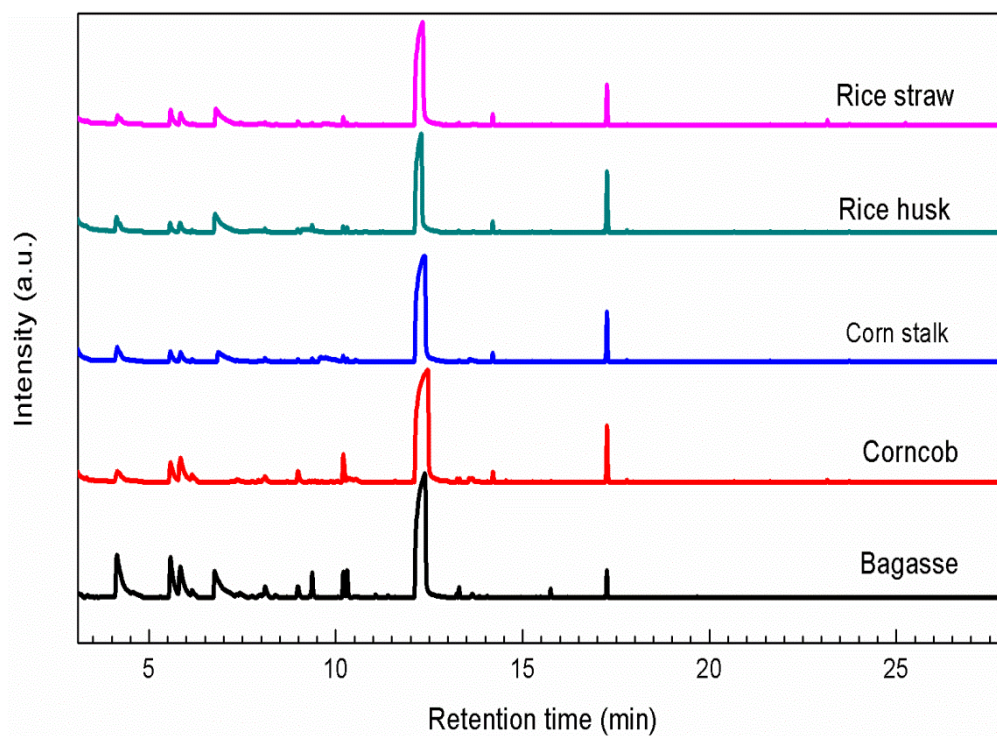

Figure S4 GC-MS spectrum of hexane-soluble fractions

Table S3 The chemicals in cyclohexane determined by GC-MS<sup>[a]</sup>

| RT (min) | Compounds                                      | Percentage (%) <sup>[b]</sup> |               |              |               |             |
|----------|------------------------------------------------|-------------------------------|---------------|--------------|---------------|-------------|
|          |                                                | bagasse                       | Rice<br>straw | Rice<br>husk | Corn<br>stalk | Corn<br>cob |
| 3.12     | N-methylpyrrole                                | 0.64                          | 0.81          | 0.92         | 0.68          | 0.75        |
| 3.32     | 2-methylpent-1-en-3-one                        | 0.32                          | 0.24          | 0.19         | 0.32          | 0.25        |
| 3.62     | 2-methoxypropan-1-ol                           | 0.82                          | -             | -            | -             | -           |
| 4.15     | acetic acid, butyl ester                       | 9.76                          | 2.82          | 3.16         | 5.16          | 6.02        |
| 4.37     | 2-methoxymethyl-Furan                          | 2.99                          | -             | -            | -             | -           |
| 4.54     | formic acid                                    | 2.14                          | -             | 0.03         | -             | -           |
| 4.93     | butane-1,2-diol                                | 1.02                          | -             | -            | -             | -           |
| 5.58     | 2,2'-bi(1,3-dioxolane)                         | 9.58                          | 5.63          | 5.93         | 4.35          | 4.02        |
| 5.84     | <i>n</i> -butyl ether                          | 5.60                          | 6.86          | 4.49         | 6.35          | 5.53        |
| 6.15     | butyl propionate                               | 1.25                          | 2.13          | 0.53         | 0.80          | 0.99        |
| 6.85     | cyclopent-2-enone                              | -                             | -             | 6.04         | -             | 4.54        |
| 7.17     | butyl isobutyrate                              | 0.85                          | 0.31          | -            | -             | -           |
| 7.36     | 2-methyl-6,7-dihydrobenzo<br>furan-4(5H)-one   | 0.28                          | 0.70          | 0.19         | 0.14          | 0.51        |
| 7.49     | methyl 4-oxopentanoate                         | 0.88                          | 0.57          | 0.83         | -             | -           |
| 8.05     | methyl 3-methylene-<br>cyclopentanecarboxylate | 0.21                          | 0.87          | 0.51         | -             | -           |
| 8.11     | 3-ethyl-2-hydroxy-2-<br>cyclopenten-1-one      | 1.25                          | 1.68          | 0.92         | 1.25          | 1.33        |
| 8.37     | butyl 2-hydropropanoate                        | 0.44                          | 1.68          | 0.34         | -             | 0.92        |
| 8.69     | acetophenone                                   | -                             | 0.31          | -            | -             | -           |
| 8.98     | ( <i>Z</i> )-prop-1-en-1-ylbenzene             | -                             | -             | 1.19         | 0.92          | -           |
| 9.17     | phenyl acetate                                 | -                             | -             | -            | 1.07          | -           |
| 9.28     | 2-methylbutanoic acid                          | 1.07                          | 3.20          | 0.20         | -             | -           |
| 9.36     | ( <i>E</i> )-butyl but-2-enoate                | 0.67                          | 0.36          | 0.82         | 2.67          | 1.25        |
| 9.53     | 2-methoxypropan-1-ol                           | 1.23                          | 0.77          | -            | -             | 1.57        |
| 9.94     | 2-vinylfuran                                   | -                             | -             | 0.51         | -             | 0.86        |
| 10.20    | butyl pentanoate                               | 0.87                          | 7.88          | 2.93         | 1.98          | 2.20        |
| 10.31    | pentan-3-ol                                    | 0.65                          | 1.38          | 0.75         | 1.71          | 1.25        |
| 10.37    | phenol                                         | -                             | 1.02          | -            | -             | -           |



Table S3 The chemicals in cyclohexane determined by GC-MS<sup>[a]</sup> (**continued**)

| RT<br>(min) | Compounds                               | Percentage (%) <sup>[b]</sup> |               |              |               |             |
|-------------|-----------------------------------------|-------------------------------|---------------|--------------|---------------|-------------|
|             |                                         | bagasse                       | Rice<br>straw | Rice<br>husk | Corn<br>stalk | Corn<br>cob |
| 10.53       | 3-methyldihydrofuran-2,5-dione          | -                             | -             | 0.15         | 0.16          | 0.47        |
| 10.89       | 1-ethyl-4-methoxy benzene               | 0.72                          | 0.92          | -            | 0.13          | 0.12        |
| 11.15       | dimethyl gultarate                      | 1.31                          | 0.12          | -            | 0.12          | 0.30        |
| 11.58       | 1-methoxy-4vinyl benzene                | 0.88                          | 0.39          | -            | -             | -           |
| 12.07       | <i>p</i> -(acetylamino)phenol           | 0.72                          | 0.72          | -            | -             | 0.30        |
| 12.46       | 2-(diethoxymethyl)furan                 | 35.13                         | 36.92         | 39.23        | 40.81         | 45.03       |
| 13.24       | butyl furan-2- carboxylate              | 0.76                          | 1.09          | 0.16         | 0.58          | 0.14        |
| 13.32       | <i>n</i> -butyl levulinate              | 1.42                          | 1.04          | 0.32         | -             | 0.69        |
| 13.57       | ( <i>E</i> )-2-methylhepta-1,5-diene    | -                             | 1.10          | 0.35         | 0.17          | 0.86        |
| 13.63       | 2-isopropyl-5-methylcyclohexyl acrylate | -                             | 1.11          | 0.35         | 0.17          | 0.63        |
| 13.84       | isobutyric anhydride                    | 0.77                          | -             | -            | -             | -           |
| 14.06       | butyl 2-hydroxyacetate                  | 1.89                          | 0.23          | -            | -             | -           |
| 14.21       | dimethyl succinate                      | 0.84                          | 2.94          | 4.04         | 4.92          | 3.47        |
| 15.76       | dimethyl-2-methyl succinate             | 1.55                          | 0.46          | -            | 0.19          | 0.17        |
| 17.26       | pentadecane                             | 6.53                          | 12.01         | 15.39        | 12.30         | 9.92        |
| 17.79       | 3-methylpentyl nonadecyl succinate      | -                             | 0.59          | 0.20         | 0.78          | 0.56        |
| 23.15       | 2-methylpentanoic acid                  | -                             | 0.60          | 1.89         | 0.32          | 0.28        |
| 25.25       | allyl cyclobutane carboxylate           | -                             | -             | 0.73         | -             | -           |

[a] Conditions: Shimadzu RTX capillary column: 30 m × 0.25 mm × 0.25 μm. The oven temperature was programmed as following: It hold at 60 °C for 3 min and then ramped up to 280 °C with 8 °C/min and hold for another 5 min; injector: kept at 280 °C in spit mode with spit ratio of 5: 1; helium as the carrier gas.

[b] Measured using peak area normalization method.

## SEM images from different catalytic systems

The surface morphologies of residues from different liquefaction systems were obtained by Hitachi 3700 SEM apparatus.

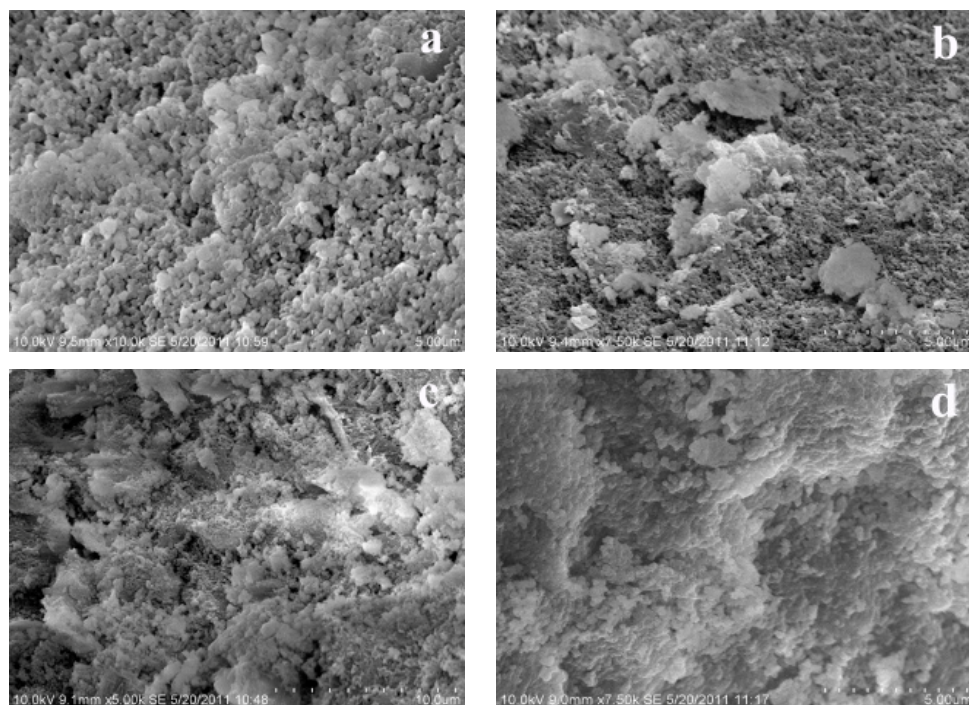

Figure S5 Surface morphologies of catalytic residues from bagasse liquefaction  
(a)  $C_4H_8SO_3HmimHSO_4$ ; (b)  $mimHSO_4$ ; (c)  $bmimHSO_4$ ; (d)  $C_2H_4COOHmimCl$   
Reaction conditions: 3.0 g bagasse, 10.0 g  $bmimCl$  (pre-dissolved in 5 mL  $CH_3OH$ ), 2.0 mmol acid IL and 70 mL cyclohexane; 200 °C, 30 min.

## GPC analysis on the average molecular weight of extracted lignin

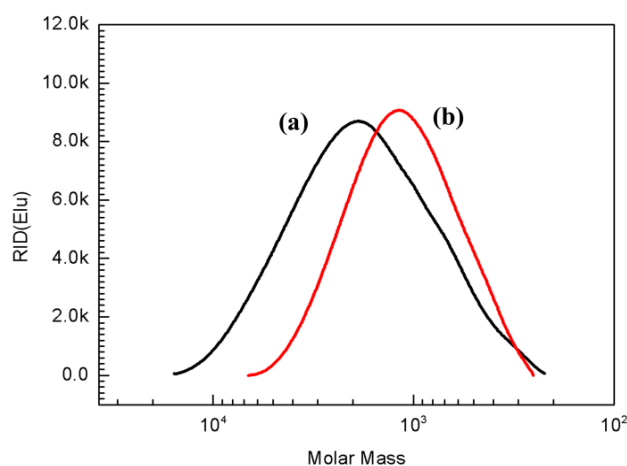

Figure S6 The molecular weight distribution of (a): lignin from original bagasse; (b): lignin from residue

## References:

- 1 P. Bonhote, A. P. Dias, N. Papageorgiou, K. Kalyanasundaram, M. Gratzel, *Inorg. Chem.*, 1996, **35**, 1168-1178.
- 2 A. C. Cole, J. L. Jensen, I. Ntai, K. L. T. Tran, K. J. Weaver, D. C. Forbes, J. H. Davis, *J. Am. Chem. Soc.*, 2002, **124**, 5962-5963.
- 3 J. Z. Gui, X. H. Cong, D. Liu, X. T. Zhang, Z. D. Hu, Z. L. Sun, *Catal. Commun.*, 2004, **5**, 473-477.
- 4 W. Wang, L. Shao, W. Cheng, J. Yang, M. He, *Catal. Commun.*, 2008, **9**, 337-341.
- 5 V. Singh, S. Kaur, V. Sapehiyia, J. Singh, G. L. Kad, *Catal. Commun.*, 2005, **6**, 57-60.
- 6 P. Wasserscheid, M. Sesing, W. Korth, *Green Chem.*, 2002, **4**, 134-138.
- 7 Z. F. Fei, D. B. Zhao, T. J. Geldbach, R. Scopelliti, P. J. Dyson, *Chem. Eur. J.*, 2004, **10**, 4886-4893.
- 8 X. H. Li, W. G. Geng, J. X. Zhou, W. Luo, F. R. Wang, L. F. Wang, S. C. Tsang, *New J. Chem.*, 2007, **31**, 2088-2094.
- 9 X. H. Li, H. L. Duan, J. T. Pan, L. F. Wang, *Chinese J. Anal. Chem.* 2006, **34**, S192-S194.
- 10 C. Thornazeau, H. Olivier-Bourbigou, L. Magna, S. Luts, B. Gilbert, *J. Am. Chem. Soc.*, 2003, **125**, 5264-5265.
